# Supplementary material for: Cinnamaldehyde-Based Self-Nanoemulsion (CA-SNEDDS) Accelerates Wound Healing and Exerts Antimicrobial, Antioxidant, and Anti-Inflammatory Effects in Rats’ Skin Burn Model
Source: MDPI journal article supplement (doi:10.3390/molecules27165225), 2022-08-16
Supplement: s1 [file s1]

# Supplementary Material

Results

|                         | Size (d.n...  | % Intensity: | St Dev (d.n... |
|-------------------------|---------------|--------------|----------------|
| Z-Average (d.nm): 31.59 | Peak 1: 20.86 | 53.8         | 9.059          |
| Pdl: 0.651              | Peak 2: 200.9 | 43.8         | 103.8          |
| Intercept: 0.740        | Peak 3: 4435  | 2.4          | 910.0          |
| Result quality          | Good          |              |                |

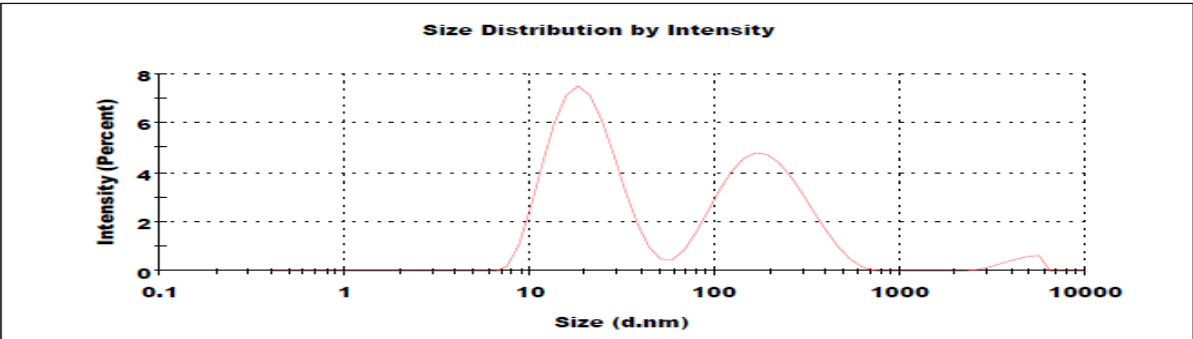

Figure S1. The particle size distribution of self-nano emulsifying drug delivery system (SNEDDS).

Results

|                         | Size (d.n...  | % Intensity: | St Dev (d.n... |
|-------------------------|---------------|--------------|----------------|
| Z-Average (d.nm): 38.63 | Peak 1: 48.27 | 88.8         | 39.78          |
| Pdl: 0.431              | Peak 2: 360.4 | 6.8          | 117.6          |
| Intercept: 0.851        | Peak 3: 5075  | 4.4          | 568.7          |
| Result quality          | Good          |              |                |

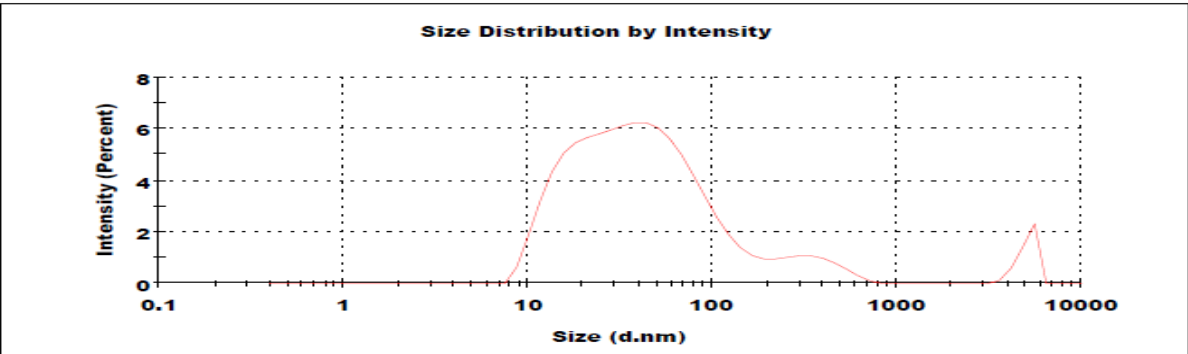

Figure S2. The particle size distribution of cinnamaldehyde loaded self-nano emulsifying drug delivery system (CA-SNEDD).

## Results

|                                     | Mean (mV)            | Area (%) | St Dev (mV) |
|-------------------------------------|----------------------|----------|-------------|
| <b>Zeta Potential (mV):</b> -9.70   | <b>Peak 1:</b> -12.7 | 62.7     | 4.97        |
| <b>Zeta Deviation (mV):</b> 6.62    | <b>Peak 2:</b> -3.46 | 37.3     | 2.93        |
| <b>Conductivity (mS/cm):</b> 0.0603 | <b>Peak 3:</b> 0.00  | 0.0      | 0.00        |
| <b>Result quality</b> Good          |                      |          |             |

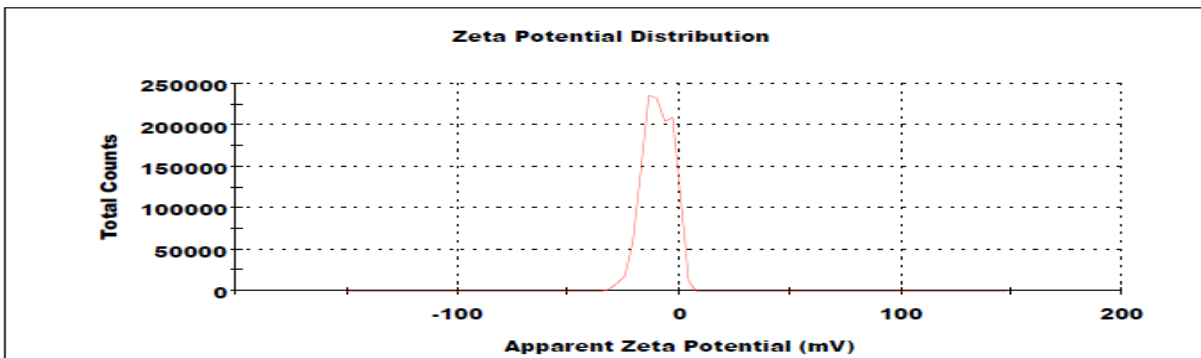

Figure S3. The zeta potential of self-nano emulsifying drug delivery system (SNEDDS).

## Results

|                                     | Mean (mV)            | Area (%) | St Dev (mV) |
|-------------------------------------|----------------------|----------|-------------|
| <b>Zeta Potential (mV):</b> -9.90   | <b>Peak 1:</b> -9.90 | 100.0    | 4.10        |
| <b>Zeta Deviation (mV):</b> 4.10    | <b>Peak 2:</b> 0.00  | 0.0      | 0.00        |
| <b>Conductivity (mS/cm):</b> 0.0731 | <b>Peak 3:</b> 0.00  | 0.0      | 0.00        |
| <b>Result quality</b> Good          |                      |          |             |

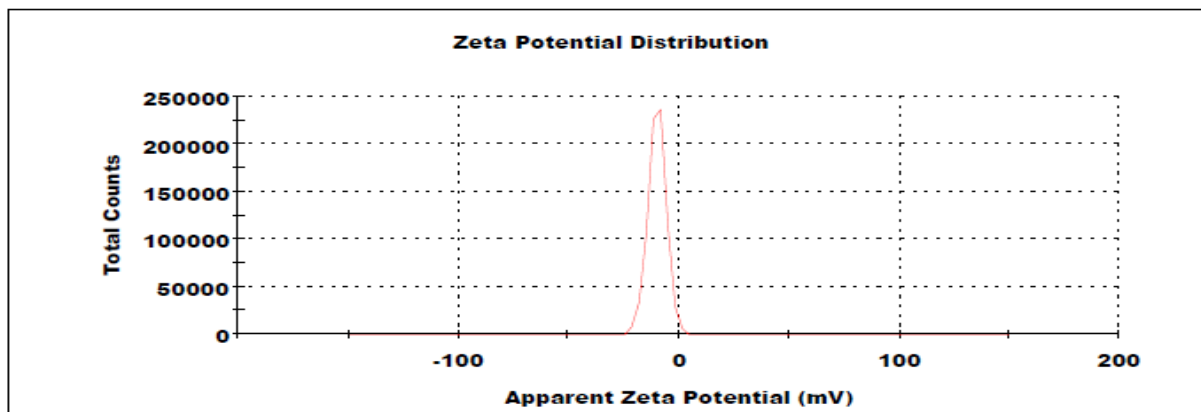

Figure S4. The zeta potential of cinnamaldehyde loaded self-nano emulsifying drug delivery system (CA-SNEDDS).

**Table S1:** One-way ANOVA for CA-SNEDDS.

| ANOVA          |                |    |             |         |      |
|----------------|----------------|----|-------------|---------|------|
| CA-SNEDDS      |                |    |             |         |      |
|                | Sum of Squares | df | Mean Square | F       | Sig. |
| Between Groups | 2746.800       | 9  | 305.200     | 975.080 | .000 |
| Within Groups  | 6.260          | 20 | .313        |         |      |
| Total          | 2753.060       | 29 |             |         |      |

**Table S2:** Raw data of CAT assay**CAT**

|                | Negative control | SNEDDS control | Silver Sulfadiazine | Cinnamaldehyde SNEDDS |
|----------------|------------------|----------------|---------------------|-----------------------|
|                | 0.298            | 0.367          | 0.373               | 0.337                 |
|                | 0.297            | 0.347          | 0.324               | 0.372                 |
|                | 0.312            | 0.304          | 0.398               | 0.359                 |
|                | 0.317            | 0.309          | 0.338               | 0.321                 |
|                | 0.321            | 0.361          | 0.35                | 0.396                 |
| <b>Average</b> | <b>0.309</b>     | <b>0.338</b>   | <b>0.357</b>        | <b>0.357</b>          |
| <b>median</b>  | <b>0.312</b>     | <b>0.347</b>   | <b>0.350</b>        | <b>0.359</b>          |
| <b>S.D</b>     | <b>0.011</b>     | <b>0.029</b>   | <b>0.029</b>        | <b>0.029</b>          |
| <b>n</b>       | <b>5.000</b>     | <b>5.000</b>   | <b>5.000</b>        | <b>5.000</b>          |
| <b>S.E</b>     | <b>0.005</b>     | <b>0.013</b>   | <b>0.013</b>        | <b>0.013</b>          |

**Table S3:** Raw data of SOD assay**SOD**

| Negative control | SNEDDS control | Silver Sulfadiazine | Cinnamaldehyde SNEDDS |
|------------------|----------------|---------------------|-----------------------|
| 0.207591         | 0.15004        | 0.217694            | 0.209622              |
| 0.184462         | 0.171549       | 0.220189            | 0.201746              |
| 0.139786         | 0.116436       | 0.239262            | 0.182252              |
| 0.11392          | 0.118086       | 0.196276            | 0.20278               |
| 0.086867         | 0.09334        | 0.208863            | 0.21944               |

|              |              |              |              |
|--------------|--------------|--------------|--------------|
| <b>0.147</b> | <b>0.130</b> | <b>0.216</b> | <b>0.203</b> |
| <b>0.140</b> | <b>0.118</b> | <b>0.218</b> | <b>0.203</b> |
| <b>0.050</b> | <b>0.031</b> | <b>0.016</b> | <b>0.014</b> |
| <b>5.000</b> | <b>5.000</b> | <b>5.000</b> | <b>5.000</b> |
| <b>0.022</b> | <b>0.014</b> | <b>0.007</b> | <b>0.006</b> |

Table S4: Raw data of NAP3 assay

| NAP3             |                |                     |                       |
|------------------|----------------|---------------------|-----------------------|
| Negative control | SNEDDS control | Silver Sulfadiazine | Cinnamaldehyde SNEDDS |
| 35.59333         | 37.0441        | 29.02667            | 30.39333              |
| 33.72667         | 36.02667       | 28.26               | 32.62667              |
| 67.29333         | 42.22667       | 31.39333            | 33.56                 |
| 50.99333         | 43.02667       | 30.96               | 36.29333              |
| 41.19333         | 39.22667       | 29.89333            | 30.76                 |
| <b>45.760</b>    | <b>39.510</b>  | <b>29.907</b>       | <b>32.727</b>         |
| <b>41.193</b>    | <b>39.227</b>  | <b>29.893</b>       | <b>32.627</b>         |
| <b>13.785</b>    | <b>3.084</b>   | <b>1.304</b>        | <b>2.384</b>          |
| <b>5.000</b>     | <b>5.000</b>   | <b>5.000</b>        | <b>5.000</b>          |
| <b>6.165</b>     | <b>1.379</b>   | <b>0.583</b>        | <b>1.066</b>          |

Table S5: Raw data of MPO assay

| MPO              |                |                     |                       |
|------------------|----------------|---------------------|-----------------------|
| Negative control | SNEDDS control | Silver Sulfadiazine | Cinnamaldehyde SNEDDS |
| 0.253495         | 0.253495       | 0.252889            | 0.251332              |
| 0.25237          | 0.252457       | 0.251419            | 0.251592              |
| 0.257734         | 0.25436        | 0.253235            | 0.25237               |
| 0.252803         | 0.25263        | 0.251419            | 0.252543              |
| 0.25237          | 0.251246       | 0.252197            | 0.252457              |
| <b>0.254</b>     | <b>0.253</b>   | <b>0.252</b>        | <b>0.252</b>          |
| <b>0.253</b>     | <b>0.253</b>   | <b>0.252</b>        | <b>0.252</b>          |
| <b>0.002</b>     | <b>0.001</b>   | <b>0.001</b>        | <b>0.001</b>          |
| <b>5.000</b>     | <b>5.000</b>   | <b>5.000</b>        | <b>5.000</b>          |
| <b>0.001</b>     | <b>0.001</b>   | <b>0.000</b>        | <b>0.000</b>          |
